# Supplementary material for: Ti3C2TxMXene Composite 3D Hydrogel Potentiates mTOR Signaling to Promote the Generation of Functional Hair Cells in Cochlea Organoids
Source: PubMed Central journal article supplement (PMC9661825; doi:10.1002/advs.202203557), 2022-09-18
Supplement: ADVS-9-2203557-s001.pdf [file ADVS-9-2203557-s001.pdf]

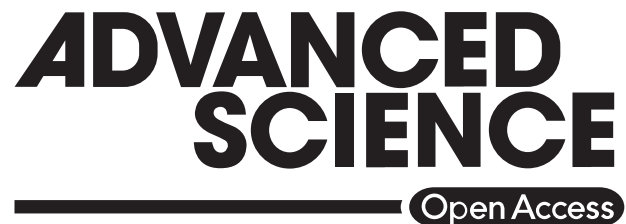

## Supporting Information

for *Adv. Sci.*, DOI 10.1002/adv.202203557

Ti<sub>3</sub>C<sub>2</sub>T<sub>x</sub>MXene Composite 3D Hydrogel Potentiates mTOR Signaling to Promote the Generation of Functional Hair Cells in Cochlea Organoids

Zhong Zhang, Shan Gao, Yang-Nan Hu, Xin Chen, Cheng Cheng, Xiao-Long Fu, Sha-Sha Zhang, Xin-Lin Wang, Yu-Wei Che, Chen Zhang and Ren-Jie Chai\*

## Supplementary Materials

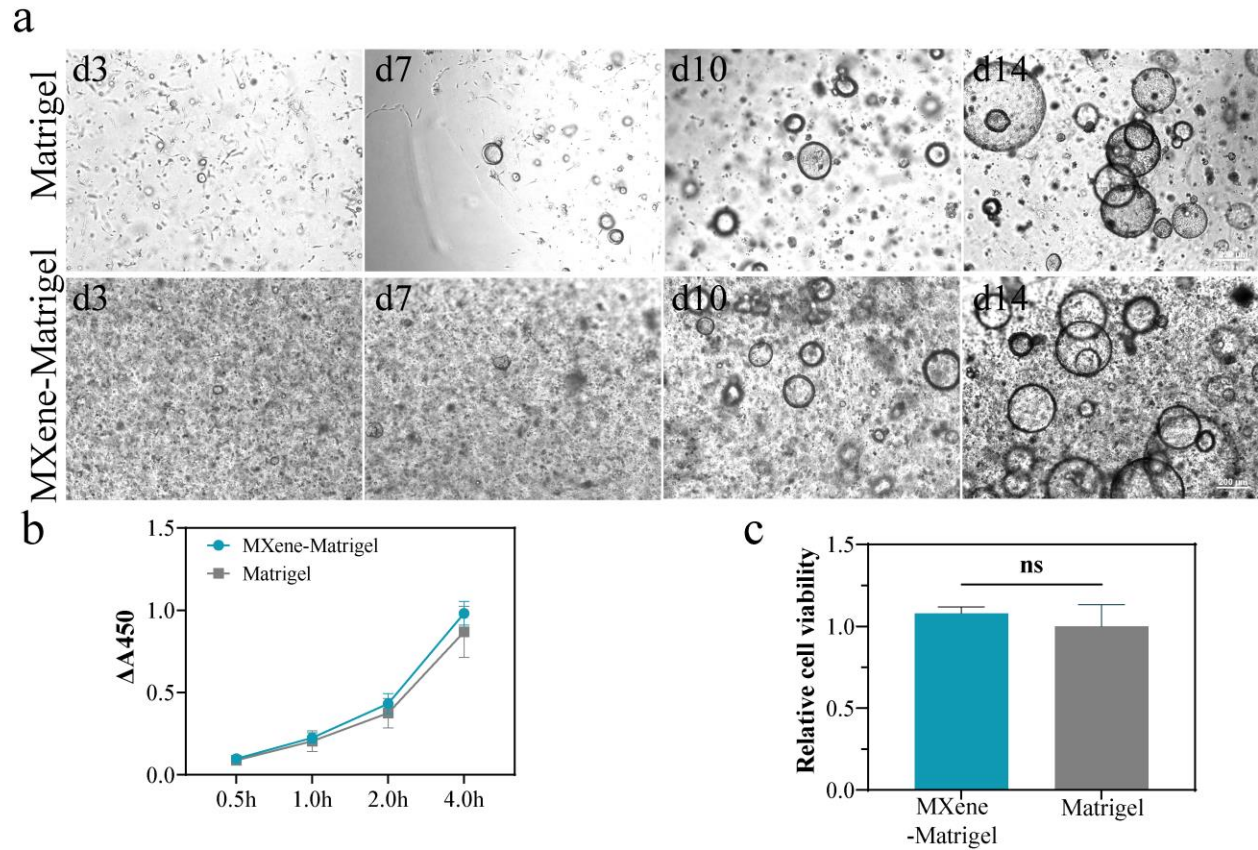

Figure s1. Development of Cochlea-Orgs in different time points. a) Representative BF images of Cochlea-Orgs development in MXene-Matrigel and Matrigel. Small pellets were formed at day3 and develop into organoids at day 7. After further expansion, the diameter of Cochlea-Orgs became bigger at day10 and day14. b, c) After 10 days of expansion, the relative cell viability of the Mxene-Matrigel and Matrigel groups was tested by conducting CCK-8 assay. A450 was measured to determine the relative cell viability in the two groups at different time points.

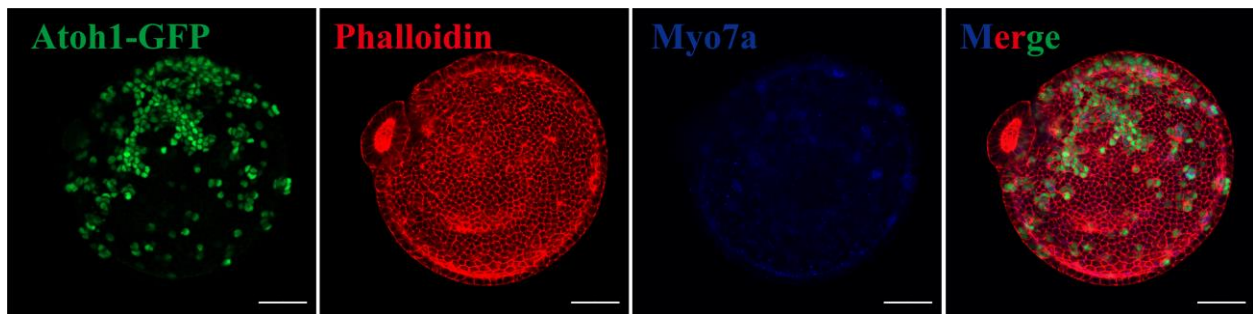

Figure s2. The expression of Atoh1-GFP and Myo7a in organoid cultured in FCM. After proliferation for 10 days in Mxene-Matrigel, most of newly generated hair cells are labeled by Atoh1-GFP+ hair cells but not Myo7a. Scale bar = 50  $\mu$ m.

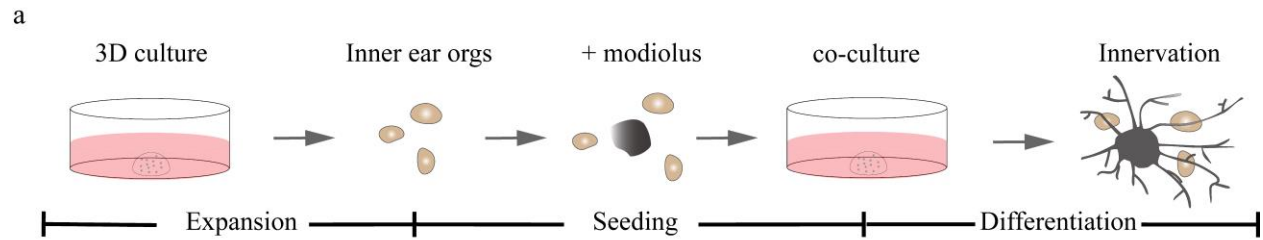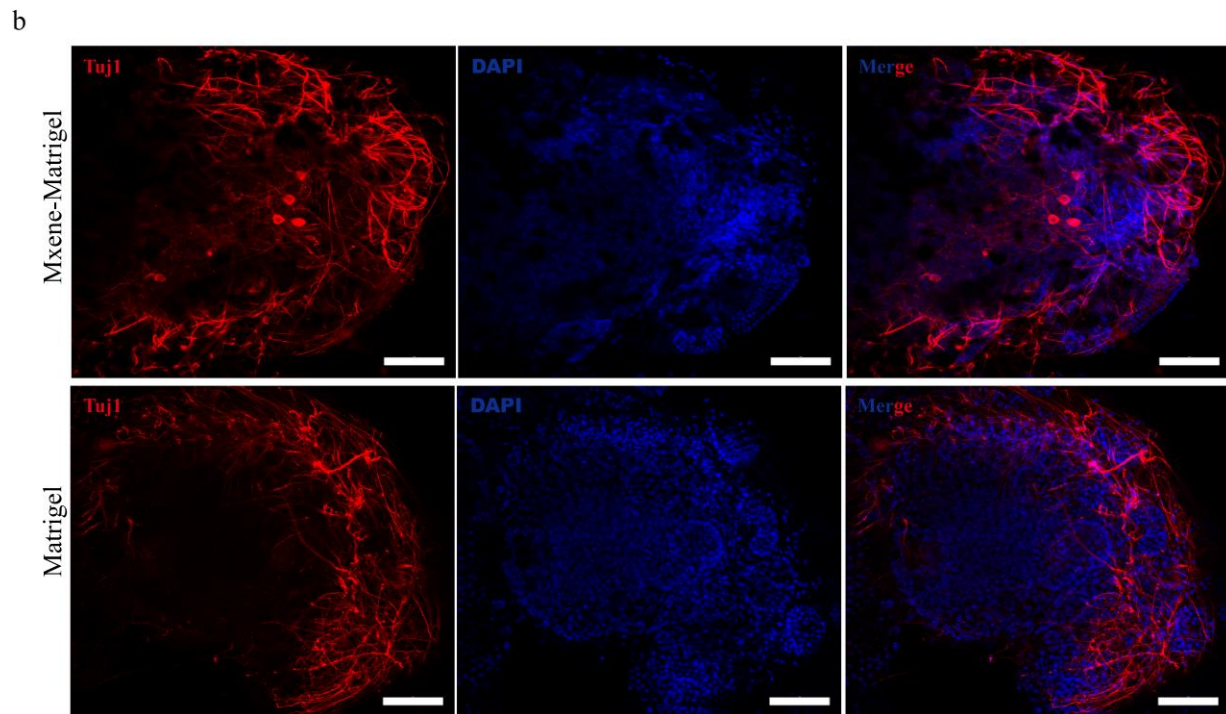

Figure S3. Cochlea-Orgs and modiolus co-culture. a) Experimental design for 3D co-culture system of Cochlea-Orgs and modiolus. b) immunofluorescent images showed the connection of Cochlea-Orgs and modiolus in the co-culture system. Scale bar = 100  $\mu$ m.

Table S1. The list of primer sequences

|       |         |                       |
|-------|---------|-----------------------|
| Atoh1 | Forward | ATGCACGGGCTGAACCA     |
|       | Reverse | TCGTTGTTGAAGGACGGGATA |
| Myo7a | Forward | CCCCCTCTGAGAAGTTCGTAA |

|        |         |                             |
|--------|---------|-----------------------------|
|        | Reverse | TGTGTCCGAGTTCCGTTGAC        |
| vGlut3 | Forward | TGGACCTTCTATTTGCTCCTG       |
|        | Reverse | GCACCACGATTGTCATCACC        |
| Pou4f3 | Forward | GCACCATCTGCAGGTTCGA         |
|        | Reverse | CCGGCTTGAGAGCGATCAT         |
| Ano1   | Forward | TTCCCTCTGGCTCCACTCTTC       |
|        | Reverse | GGCATCCAGGCGGATCT           |
| Kcnq   | Forward | GGCTCCTCATCTTCGCCTAC        |
|        | Reverse | CCATGGTCTGGTCCTGAGTT        |
| cav1.3 | Forward | TGCACAGATGAAGCCAAAAG        |
|        | Reverse | TGTCCCATCACTGTTGAGAGGCAT    |
| Kcnq   | Forward | CTTGGCTGGGAAGATTGCTTTC      |
|        | Reverse | TCTCAAAGTGTTTCTGGCGGTG      |
| Kcnc10 | Forward | GAGACCAGCACATCCCATCT        |
|        | Reverse | TAGCCTGGCTCTTCATGGAT        |
| Myo3b  | Forward | TGCCTCCACATTTTCAGTGCTGG     |
|        | Reverse | CGACCACCATTTTGGAGAGCAG      |
| Cdh23  | Forward | ACACCAGTGGGGACACCCATCTTCATC |
|        | Reverse | AGACAATAGTGTAGCCAATCCCACGG  |
| Ptprq  | Forward | GTATGGCTGACGTGGAGTCCAA      |
|        | Reverse | GTCCAGCAAGTTTGGCATCAGTC     |
| Loxhd  | Forward | TACGAGGAGGAGCTGCTGAACTACGA  |
|        | Reverse | CATCCCCTGTGGCTGTGACC        |
| Wif1   | Forward | CTTTGCTGGGAACAGTGCCTCA      |

|        |         |                        |
|--------|---------|------------------------|
|        | Reverse | GGTCCTAAGGATGGTGTTCCT  |
| Dkk3   | Forward | GGAGGAAGCTACGCTCAATGAG |
|        | Reverse | TTGCCAGGTTACCTCAGAGGA  |
| Oct    | Forward | GCCTTGCAGCTCAGCCTTAA   |
|        | Reverse | AAGCCAGGAATGGAAGCAGC   |
| Sox2   | Forward | CCAGCGCATGGACAGCTA     |
|        | Reverse | GCTGCTCCTGCATCATGCT    |
| Pax2   | Forward | GACAGCACCAGACAAGAGGC   |
|        | Reverse | TAGCCAAAAGCCTCGGCAG    |
| Pax8   | Forward | CTTTGCAGTCCCCAGCTCAG   |
|        | Reverse | GCCAAGTGCTCTCCTGTGTC   |
| Lgr5   | Forward | CCCAATGCGTTTTCTACGT    |
|        | Reverse | GAAGGACGACAGGAATTGGAT  |
| Fst    | Forward | GAAAACCTACCGCAACGAATG  |
|        | Reverse | TCCGGCTGCTCTTTGCAT     |
| Hmga2  | Forward | CAGAAGAAAGCAGAGACCATT  |
|        | Reverse | TTGTTGTGGCCATTTCTAGGT  |
| Fat3   | Forward | CACAGCCCTTGAATACAGTGA  |
|        | Reverse | TGCCTTTGCATCTCCTTCCT   |
| Trim71 | Forward | ATCGGGAGTGTGAGCTGTTG   |
|        | Reverse | GGCGTGAACATAATGCGGTC   |
| Nestin | Forward | GTCCTGGTTCCTGAACTTGTC  |
|        | Reverse | GCTTCTTTCTCTACCAGTTCCC |
| GAPDH  | Forward | AACACAGTCCATGCC        |

|  |         |                    |
|--|---------|--------------------|
|  | Reverse | TCCACCACCCTGTTGCTG |
|--|---------|--------------------|

Table S2. List of antibodies used for immunostaining.

| <b>Reagent type</b> | <b>Designation</b>                                     | <b>Source</b>          | <b>Identifiers</b> |
|---------------------|--------------------------------------------------------|------------------------|--------------------|
| primary antibody    | myo7a<br>Rabbit<br>polyclonal                          | Proteus<br>Biosciences | Cat.# 25-<br>6790  |
| primary antibody    | SOX2<br>Goat polyclonal                                | Santa Cruz             | Cat.# sc-<br>17320 |
| primary antibody    | $\beta$ III Tubulin<br>Mouse<br>monoclonal             | R&D<br>systems         | Cat.#<br>MAB1195   |
| primary antibody    | PSD95<br>Mouse<br>monoclonal                           | Sigma-<br>Aldrich      | Cat.#<br>MAB1596   |
| primary antibody    | Synapsin-1<br>(D12G5)<br>Rabbit<br>monoclonal          | Cell<br>Signaling      | Cat.#<br>#5297     |
| secondary antibody  | donkey anti-<br>rabbit IgG<br>(H+L) Alexa<br>Fluor 555 | Thermo<br>Fisher       | Cat.# A-<br>31572  |
| secondary antibody  | donkey anti-<br>mouse IgG<br>(H+L) Alexa<br>Fluor 488  | Thermo<br>Fisher       | Cat.# A-<br>21202  |
| secondary antibody  | donkey anti-<br>goat IgG (H+L)<br>Alexa Fluor 647      | Thermo<br>Fisher       | Cat.# A-<br>21447  |
| secondary antibody  | goat anti-mouse<br>IgG2a Alexa<br>Fluor 647            | Thermo<br>Fisher       | Cat.# A-<br>21241  |
| secondary antibody  | goat anti-rabbit<br>IgG (H+L)<br>Alexa Fluor 546       | Thermo<br>Fisher       | Cat.# A-<br>11011  |
